# Supplementary material
Source: Springer Nature journal article supplement (https://www.springermedizin.de/resource/supplementary/13046_2011_503_MOESM1_ESM.pdf/9662376)

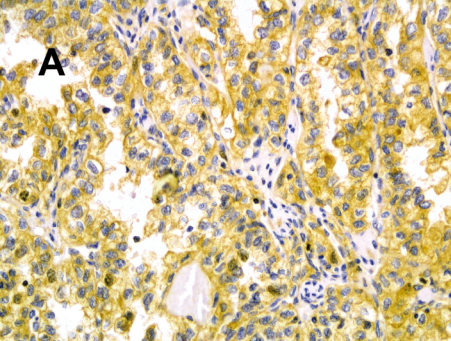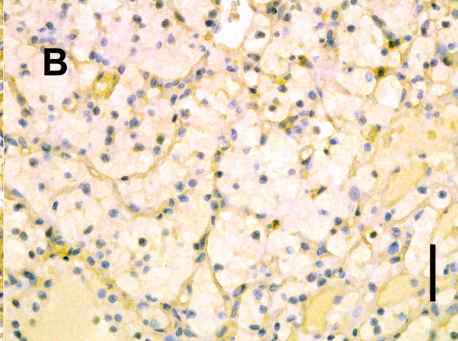

Supplement: MOESM1 [file 9662376]
